# Supplementary material
Source: Springer Nature journal article supplement (https://www.springermedizin.de/resource/supplementary/12958_2008_470_MOESM2_ESM.pdf/9567978)

**C**

**siRNA**

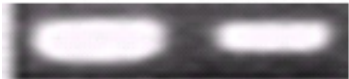

**VEGF (200bp)**

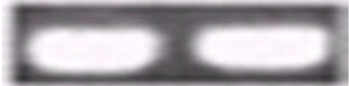

**GAPDH (452bp)**

Supplement: MOESM2 [file 9567978]
